# Supplementary material for: WBP2 promotes BTRC mRNA stability to drive migration and invasion in triple‐negative breast cancer via NF‐κB activation
Source: PubMed Central journal article supplement (PMC8763649; doi:10.1002/1878-0261.13048), 2021-08-12

Fig. S6

ALL

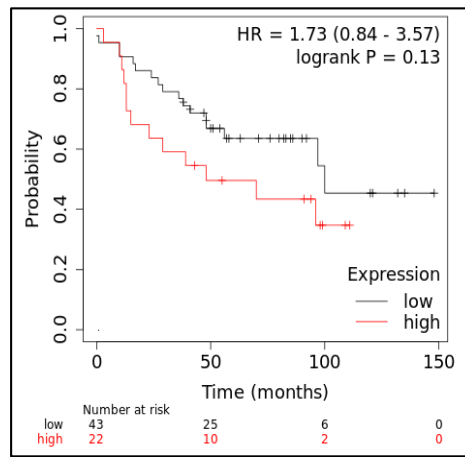

ER+

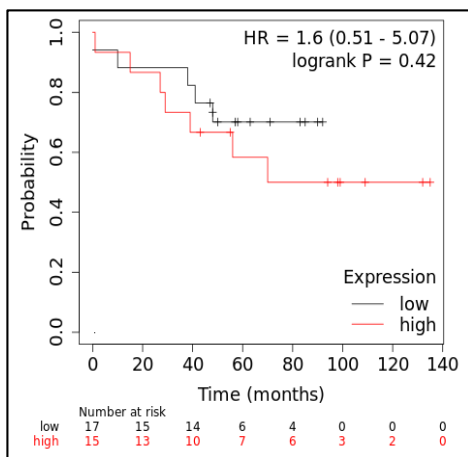

ER-

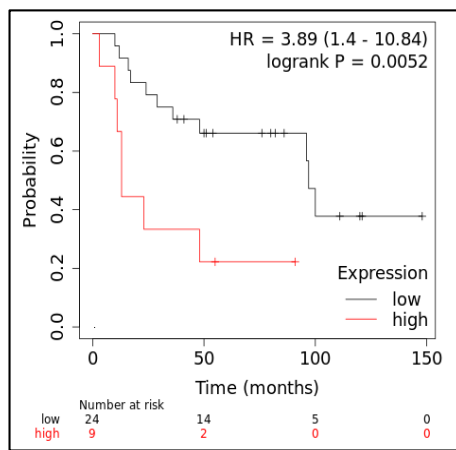

Supplement: MOL2-16-422-s002.pdf [file MOL2-16-422-s002.pdf]
