# Supplementary material for: WBP2 promotes BTRC mRNA stability to drive migration and invasion in triple‐negative breast cancer via NF‐κB activation
Source: PubMed Central journal article supplement (PMC8763649; doi:10.1002/1878-0261.13048), 2021-08-12

**Fig. S2**

**(A)(i)**

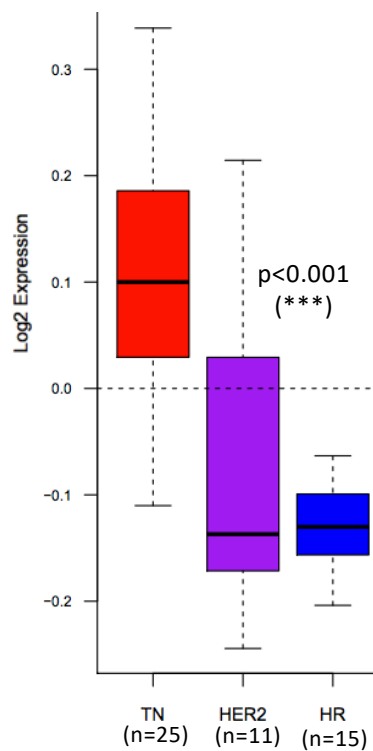

**(ii)**

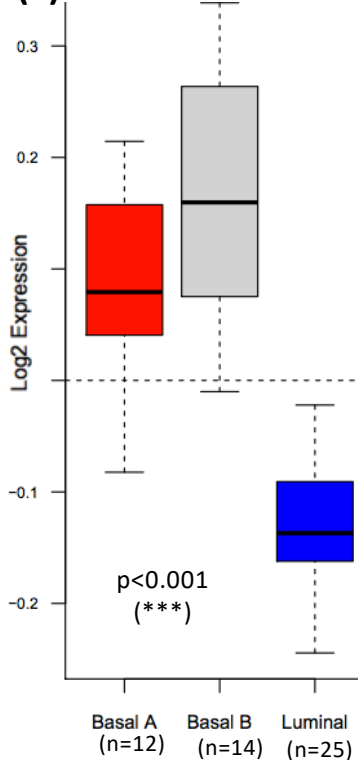

**(B)**

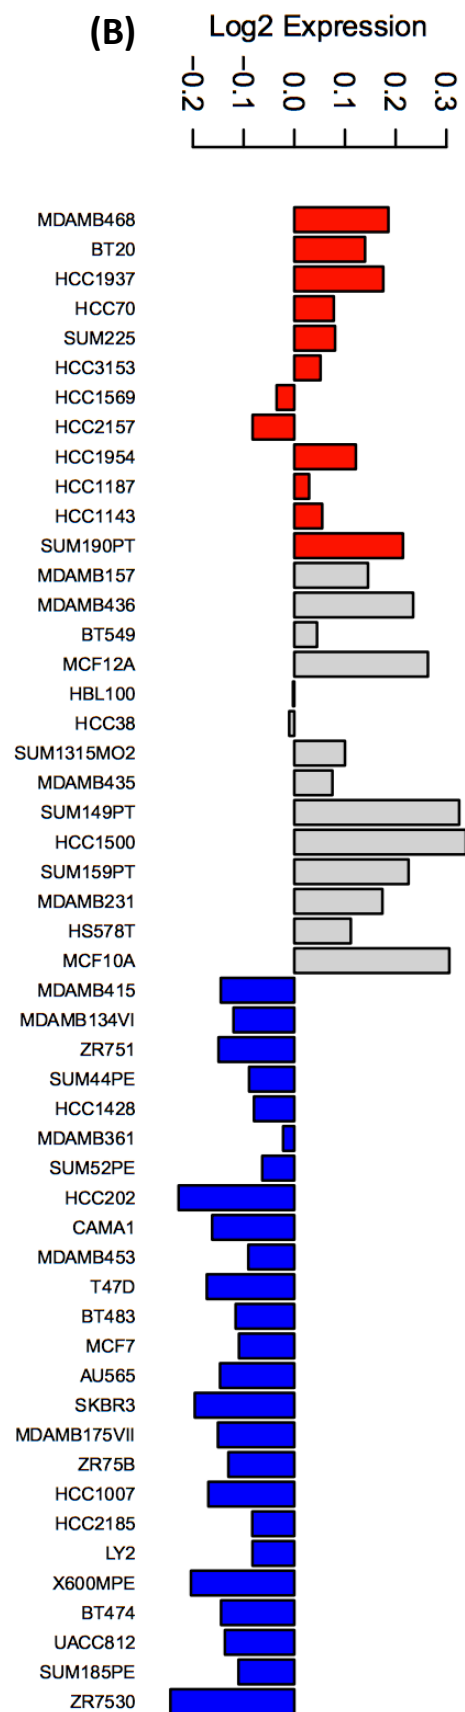

Supplement: MOL2-16-422-s005.pdf [file MOL2-16-422-s005.pdf]
